# 1           **Circulation of SARS-CoV-2 and co-infection with** 2           ***Plasmodium falciparum* in Equatorial Guinea**

3  
4   Diana López-Farfán<sup>1</sup>, Policarpo Ncogo<sup>2,3</sup>, Consuelo Oki<sup>4</sup>, Matilde Riloha<sup>4</sup>, Valero Ondo<sup>4</sup>,  
5   Pablo Cano-Jiménez<sup>5</sup>, Francisco José Martínez-Martínez<sup>5</sup>, Iñaki Comas<sup>5,6</sup>, Nerea  
6   Irigoyen<sup>7</sup>, Pedro Berzosa<sup>3,8</sup>, Agustín Benito Llanes<sup>8</sup> & Elena Gómez-Díaz<sup>1</sup>

7  
8   <sup>1</sup>Instituto de Parasitología y Biomedicina López-Neyra, Consejo Superior de  
9   Investigaciones Científicas (IPBLN, CSIC), Granada, Spain.

10   <sup>2</sup>Instituto de Salud Carlos III, Madrid, Spain.

11   <sup>3</sup>Fundación CSAI. Madrid, Spain.

12   <sup>4</sup>Ministerio de Sanidad y Bienestar Social, Malabo, Equatorial Guinea.

13   <sup>5</sup>Instituto de Biomedicina de Valencia, Consejo Superior de Investigaciones Científicas  
14   (IBV, CSIC), Valencia, Spain.

15   <sup>6</sup>CIBER in Epidemiology and Public Health, Madrid, Spain

16   <sup>7</sup>Division of Virology, Department of Pathology, University of Cambridge, Cambridge,  
17   UK.

18   <sup>8</sup>Centro Nacional de Medicina Tropical. CIBERINFEC, Instituto de Salud Carlos III.  
19   Madrid, Spain.

20  
21   \* Corresponding author:

22   E-mail: [diana.lopez@ipb.csic.es](mailto:diana.lopez@ipb.csic.es) (DL-F)

23  
24   Keywords: COVID-19, malaria, co-infection, coronavirus, Africa, genomic surveillance

NOTE: This preprint reports new research that has not been certified by peer review and should not be used to guide clinical practice.

25

## 26 **Abstract**

27 The impact of COVID-19 in Africa has been a big concern since the beginning of the  
28 pandemic. However, low incidence of COVID-19 case severity and mortality has been  
29 reported in many African countries, although data are highly heterogeneous and, in some  
30 regions, like Sub-Saharan Africa, very scarce. Many of these regions are also the cradle  
31 of endemic infectious diseases like malaria. The aim of this study was to determine the  
32 prevalence of SARS-CoV-2, the diversity and origin of circulating variants as well as the  
33 frequency of co-infections with malaria in Equatorial Guinea. For this purpose, we  
34 conducted antigen diagnostic tests for SARS-CoV-2, and microscopy examinations for  
35 malaria of 1,556 volunteers at six health centres in Bioko and Bata from June to October  
36 2021. Nasopharyngeal swab samples were also taken for molecular detection of SARS-  
37 CoV-2 by RT-qPCR and whole genome viral sequencing. We report 3.0% of SARS-  
38 CoV-2 and 24.4% of malaria prevalence over the sampling in Equatorial Guinea. SARS-  
39 CoV-2 cases were found at a similar frequency in all age groups, whereas the age groups  
40 most frequently affected by malaria were children (36.8% [95% CI 30.9-42.7]) and  
41 teenagers (34.7% [95% CI 29.5-39.9]). We found six cases of confirmed co-infection of  
42 malaria and SARS-CoV-2 distributed among all age groups, representing a 0.4%  
43 frequency of co-infection in the whole sampled population. Interestingly, the majority of  
44 malaria and SARS-CoV-2 co-infections were mild. We obtained the genome sequences  
45 of 43 SARS-CoV-2 isolates, most of which belong to the lineage Delta (AY.43) and that  
46 according to our pandemic-scale phylogenies were introduced from Europe in multiple  
47 occasions (7 transmission groups and 17 unique introductions). This study is relevant in  
48 providing first-time estimates of the actual prevalence of SARS-CoV-2 in this malaria-

49 endemic country, with the identification of circulating variants, their origin, and the  
50 occurrence of SARS-CoV-2 and malaria co-infection.

51

## 52 **Introduction**

53 The coronavirus disease 19 (COVID-19) has caused more than 767 million cases and 6,9  
54 million deaths worldwide. However, only a small proportion of these (around 9,5 million  
55 cases [1.24%] and 175,339 deaths [2.52%]) have occurred in Africa (data as of July 2023,  
56 WHO COVID-19 Dashboard) (1). Moreover, inside Africa, the distribution of cases has  
57 been uneven. Most of the reported cases are from a few Northern and Southern countries  
58 like South Africa (4.0 million cases), Morocco (1.27 million cases) and Tunisia (1.15  
59 million cases). In comparison, only 634,161 cases account for Central African countries.  
60 These data suggest country-specific factors such as reduced transmission or limited  
61 testing, raising questions about the real impact of the pandemic in Central African  
62 countries.

63 Genomic SARS-CoV-2 surveillance has been vital in monitoring the emergence,  
64 evolution and spread of different variants of concern (VOC). Indeed, several VOC, such  
65 as Alpha, Beta, Delta and Omicron, were first detected on the African continent or have  
66 spread extensively on it (2–4). Despite the heterogeneous pandemic across Africa, most  
67 countries have reported multiple waves of infection (4). Genomic sequencing has also  
68 revealed that each wave has been dominated by a different lineage (4,5). Within Africa  
69 regional viral population diversity has been observed in the first and second waves and,  
70 to a lesser extent, in the third wave. In North and Southern Africa, the first and second  
71 waves were dominated by Beta (B1) and Alpha lineages, replaced by Delta and Omicron  
72 in the third and fourth waves, respectively. However, different lineages in West, East and  
73 Central Africa have dominated the first, second and third waves (4). In addition, other

74 minor lineages have been detected co-circulating and contributing to epidemic waves in  
75 all regions of the continent (4,6) . In this context, characterising the local diversity of  
76 SARS-CoV-2 variants country by country becomes critical.

77 Equatorial Guinea is located on the west coast of Central Africa and consists of two parts,  
78 the mainland and an insular region (i.e., Bioko is the main island). As of April 2023, this  
79 country had reported 17,130 cases and 183 deaths, most of them from the insular region  
80 (77,2%) (7). Like in other African countries, data about the prevalence of SARS-COV-2  
81 infection in Equatorial Guinea is still scarce. Indeed, to our knowledge, no representative  
82 studies exist which evaluate the prevalence of SARS-COV-2 in this country.

83 After Equatorial Guinea confirmed its first case of COVID-19 community transmission  
84 on March 14, 2020, there have been five waves (7). A genomic analysis of SARS-COV-  
85 2 sequences revealed that the first wave from April to July 2020 was dominated by the  
86 early lineage B.1.192, the second wave from January to April 2021 was dominated by the  
87 Beta variant (B.1.351), and the third wave began during July 2021 with the Delta variant  
88 (AY.43) (5).

89 To date, there are deposited 213 SARS-CoV-2 whole genome sequences from Equatorial  
90 Guinea on the GISAID database (8). These data correspond, however, to 1.2% of reported  
91 cases, which is far from the World Health Organization (WHO) recommendation to  
92 sequence at least 5% of COVID-19 cases by country (9). Hence, there is a need to  
93 increase the number of SARS-CoV-2 genomes to sequence for a complete assessment of  
94 the diversity of variants circulating in the country.

95 Apart from the direct mortality impact of COVID-19, the pandemic has also resulted in a  
96 worsening crisis in controlling several endemic diseases in Africa (10–12). During the  
97 first year of the COVID-19 pandemic, malaria cases and deaths in Africa increased from  
98 213 to 228 million cases and from 534,000 to 602,000 deaths (15 million more cases and

99 68,000 more deaths). This was mainly due to disruption in malaria interventions (13),  
100 reaching the worst-case scenario projected at the beginning of the pandemic (14). During  
101 2021, the increase of malaria cases continued but was less marked (2 million more cases)  
102 while deaths remained stable (13). This was possible due to the efforts of countries and  
103 partners that provided additional funding to deliver essential malaria services (13).  
104 Besides these collateral effects, the circulation of COVID-19 in malaria-endemic  
105 countries raises the possibility of co-infection. The frequency and consequences of co-  
106 infection at the population level have been assessed in eight African (15,16,25,26,17–24)  
107 and one Indian (27) malaria-endemic countries. However, these studies have shown very  
108 heterogeneous results depending on the study design and the population or subpopulation  
109 sampled (**S1 Table in S1 Text**).

110 Equatorial Guinea is among the moderate to high malaria transmission countries in the  
111 African Region, which accounts for 95% of cases and 96% of malaria deaths globally. To  
112 date, no study has examined the occurrence and frequency of SARS-COV-2 and malaria  
113 co-infection.

114 To fill these gaps, in this work, we conducted a cross-sectional study of 1,556 volunteers  
115 at six health centres, three in Bioko (island) and three in Bata (mainland), from June to  
116 October 2021. All subjects were tested for SARS-CoV-2 by rapid antigen diagnostic tests  
117 and for malaria by microscopy. Moreover, swab samples were also taken for SARS-CoV-  
118 2 RT-qPCR and whole genome viral sequencing. To our knowledge, this is one of the  
119 largest SARS-CoV-2 epidemiological studies conducted in Sub-Saharan Africa. This is  
120 also the first to evaluate SARS-COV-2 and malaria co-infection in this endemic malaria  
121 country.

122

## 123 **Methods**

124

## 125 **Ethics**

126 This protocol was revised by members of the ISCIII/FCSAI at Equatorial Guinea,  
127 approved by the Spanish National Research Council (CSIC), the Ethics Committee of  
128 Biomedical Research in Andalusia (CCEIBA), and the technical committee of the  
129 Ministry of Health and Social Welfare of Equatorial Guinea. The field procedures were  
130 carried out by the technical staff of the National Malaria Programme of the Ministry of  
131 Health and Social Welfare of Equatorial Guinea. The protocol is in conformity with the  
132 declaration of Helsinki and all international regulations about the ethical principles in  
133 biomedical research involving human subjects. SARS-CoV-2 and malaria-positive  
134 individuals were provided with treatment and assisted by medical professionals. During  
135 the screening, local authorities, health centres and volunteers were informed about the  
136 objectives of the study and the protocols performed.

137

## 138 **Study design**

139 This study was conducted at six health centres in Equatorial Guinea, three located at  
140 Bioko Island (Hospital Regional de Malabo, Centro de Salud Buena Esperanza and  
141 Centro de Salud de Campo Yaundé) and three located at the mainland city of Bata (Centro  
142 de Salud María Rafols, Centro de Salud La Libertad and Hospital Regional de Bata).  
143 1,556 volunteers were enrolled at the six health centres from 1<sup>st</sup> June to 4<sup>th</sup> October 2021  
144 (**S2 Table in S1 text**). Demographic and clinical information collected included age, sex,  
145 temperature, symptomatology and pregnancy state. Since COVID-19 vaccination started  
146 on March 2021, only non-vaccinated volunteers were eligible for the study.  
147 Prior to taking any samples, participants were required to sign the informed consent form  
148 created for the study. For each participating subject, one drop of blood was obtained by

149 capillary puncture of the fingertip. This blood was used for malaria detection by  
150 microscopy. When there was consent, a nasopharyngeal sample was also collected for  
151 rapid antigen detection of SARS-CoV-2. For SARS-CoV-2 positive antigen test  
152 volunteers, a second nasopharyngeal sample was taken, and the swab was stored in pre-  
153 filled tubes containing 0.5 mL of inactivating lysis buffer (AVL, QIAGEN) for molecular  
154 testing of SARS-CoV-2 and whole genome viral sequencing. These samples were kept at  
155 4°C for 24h and at -20°C or -80°C for extended storage and subsequent analysis.

156

## 157 **Malaria and SARS-CoV-2 diagnosis**

158 Malaria was detected by microscopy following standard methods (28). Blood thick  
159 smears were screened for *Plasmodium falciparum* asexual and gametocyte stages in the  
160 blood.

161 Antigen detection of SARS-CoV-2 was performed from individual nasal swabs samples  
162 using the Panbio™ COVID-19 Ag Rapid Test (Abbot) following the manufacturer's  
163 instructions. For SARS-COV-2 molecular detection, RNA was extracted from 140 µL of  
164 the AVL preservative solution using the QIAamp viral RNA extraction kit (QIAGEN)  
165 following the manufacturer's instructions. RT-qPCR analysis was performed using the  
166 one-step Direct SARS-CoV-2 Realtime PCR Kit (Vircell S.L) following the  
167 manufacturer's instructions, reactions were performed in 20 µL final volume (5 µL of  
168 RNA sample and 15 µL of RT-PCR mix) using a CFX96 Real-Time PCR Detection  
169 System (Bio-Rad, Hercules, CA, USA). Cycle threshold (Ct) values were analysed using  
170 the BIORAD CFX manager software. Gene targets identified with this kit were the  
171 *nucleocapsid* (N), the *envelope* (E) and the human *RNase P*. Samples were considered  
172 positive when the N and E target genes had a cycle threshold (Ct) < 40. Positive and  
173 negative controls were always included.

174

## 175 **Statistical analysis**

176 Association between variables was tested with the Wilcoxon Sum Rank tests (for  
177 continuous quantitative variables) and the Kruskal-Wallis chi-squared test.

178

## 179 **Whole genome sequencing and phylogenetic analysis**

180 RNA from SARS-CoV-2 positive samples with a Ct value  $\leq 35$  was sent for sequencing  
181 to the Instituto de Biomedicina de Valencia (IBV-CSIC). RNA was retrotranscribed into  
182 cDNA, and SARS-CoV-2 complete genome amplification was performed in two  
183 multiplex PCR, accordingly to openly available protocol developed by the ARTIC  
184 network<sup>5</sup> using the V4.1 multiplex primers scheme (artic-network n.d.). Two resulting  
185 amplicon pools were combined and used for library preparation. Genomic libraries were  
186 constructed with the Nextera DNA Flex Sample Preparation kit (Illumina Inc., San Diego,  
187 CA) according to the manufacturer's protocol with five cycles for indexing PCR. Whole  
188 genome sequencing was performed in a MiSeq platform ( $2 \times 150$  cycles paired-end run;  
189 Illumina). Sequences obtained went through an open-source bioinformatic pipeline based  
190 on IVAR6 (29). The different steps of the pipeline are as follows: 1) removal of human  
191 reads with Kraken (30); 2) filtering of the fastq files using fastp v 0.20.1 (31) (arguments:  
192 `-cut tail, -cut-window-size, -cut-mean-quality, -max_len1, -max_len2`); 3) mapping and  
193 variant calling using IVAR v 1.2; and 4) quality control assessment with MultiQC (32).  
194 Consensus sequences generated by this pipeline were aligned against the SARS-CoV-2  
195 reference sequence (33) with MAFFT (34). Problematic positions were masked using the  
196 `mask_alignment.py` script from the repository maintained by Rob Lanfear<sup>7</sup>. Lineages and  
197 clade nomenclature were assigned using Pangolin (35) and Nexclade online tool (36).



198 The phylogenetic tree was generated with Nextclade v2.5.08, downloaded in JSON  
199 format and visualised using Auspice v2.37.3 online tool<sup>19</sup> (37,38).

200

## 201 **Genome-based epidemiological analysis**

202 A genome-based epidemiological analysis was performed on the sequenced Guinea  
203 Equatorial samples following the pipeline described in Martínez-Martínez et al (39). We  
204 used a pandemic-scale phylogenomics analysis tool called UShER (40) to place the  
205 newly-sequenced samples in a prebuilt phylogeny. For this purpose, we downloaded an  
206 existing SARS-CoV-2 phylogeny (eTree) composed of 15.649.343 sequences uploaded  
207 in GISAID (8) on July 27th, 2023 from the UCSC ftp server (ftp:apache/cgi-  
208 bin/hgPhyloPlaceData/wuhcor1). This method avoids subsampling the dataset by the  
209 country of origin or the sampling date, maintaining the broadest possible context.

210 Using Robert Lanfear's `global_profile_alignment.sh` (41), we aligned the Guinea  
211 Equatorial sequences against the Wuhan reference sequence (MN908947.3). We used the  
212 `faToVcf` tool from the UShER toolbox to obtain the VCF file, and used this file as input  
213 along with the eTree to place the new 43 sequences.

214 To speed up the analysis, we extracted the Beta and Delta variants' clades from the eTree  
215 using `matUtils` (42) after identifying the parental nodes using the Taxonium viewer (43).

216 Finally, using a custom code developed in R, we identified the likely country/region of  
217 origin and the period of the introductions. To do so, we first defined 3 possible categories  
218 for our sequences: transmission group, if they fell in a node in which >60% samples were  
219 from Equatorial Guinea; unique sequence, if they fell in a node with lower presence of  
220 the country and the length of their branches is greater than 0; and unclassified, if they had  
221 no branch length. Then, we searched for the closest sequence with the minimal genetic  
222 distance in SNPs that was collected within a period between the 3 months prior to the

223 sampling date, and the sampling date minus 10 days. All the commands used in this  
224 analysis are available at the GitLab repository along with the custom code  
225 (<https://gitlab.com/tbgenomicsunit/covid-guinea>).

226

## 227 **Ethics Statement**

228 The studies involving human participants were reviewed and approved by Ethics  
229 Committee of the Spanish National Research Council (CSIC), the Ethics Committee of  
230 Biomedical Research in Andalusia (CCEIBA), and the technical committee of the  
231 Ministry of Health and Social Welfare of Equatorial Guinea. Participants were required  
232 to sign the informed consent form created for the study. As the study involved children,  
233 a signed declaration of conformity for participating was obtained from their parents  
234 and/or legal representatives.

235

## 236 **Results and Discussion**

237 Compared to the rest of the world, the impact of COVID-19 in Africa has been relatively  
238 low in terms of severe disease incidence and mortality rate. Several specific socio-  
239 ecological and economic factors (i.e., warm weather, younger population, lower  
240 population density and mobility, limited testing capacity and previously trained immunity  
241 by past infectious diseases) have been proposed to explain the apparent lower  
242 transmission (44,45). Other reports, however, suggest that this impact has been vastly  
243 underestimated, especially in low-income countries, due to insufficient testing and  
244 uneven genomic surveillance. This is probably the case in Equatorial Guinea, where no  
245 comprehensive studies assess the prevalence of SARS-CoV-2 and the number of viral  
246 genomes available is still very low.

247 Apart from the noticeable direct effects, the COVID-19 pandemic severely affected the  
248 global fight against several endemic infectious diseases, namely VIH, tuberculosis and  
249 malaria, mainly because of an interruption and reduction in their control programmes  
250 (10–12). But recent data points towards a more direct biological interaction between these  
251 diseases In the case of malaria, it has been suggested that severity of COVID-19 infection  
252 in malaria-endemic regions may be influenced by co-infection or previous malaria  
253 exposure (20,27). Some studies also suggested a possible cross-immunity due to common  
254 immunodominant epitopes between the malaria parasite and SARS-CoV-2 (46–48).  
255 Prevalence studies of SARS-CoV-2 and co-infection with malaria in sub-Saharan  
256 countries are therefore essential to understand the real impact of the pandemic in the  
257 African continent.

258 This is the first comprehensive study of SARS-CoV-2 prevalence in Equatorial Guinea  
259 and the first to evaluate malaria co-infection. For this purpose, 1,556 volunteers were  
260 recruited at six Equatorial Guinea health centres for four months in 2021 (from June to  
261 October) (**S2 Table in S1 Text**). The study was conducted in three health centres on  
262 Bioko Island (the site of the country capital, Malabo) and three health centres in the  
263 mainland city of Bata. Of the participants, 72.6% were female and 27.4% were male.  
264 Samples were distributed to four age groups as follows: A. 5-12 years old (16.8%), B. 13-  
265 20 years old (20.8%), C. 21-40 years old (46.2%) and D. >40 years (16.3%). The  
266 distribution of positive cases by age and gender is detailed in **Table 1**.

267

268 **Table 1. Demographic characteristics and distribution of positive cases in the whole sampled population by age and gender.**

269

270

|     | Age group<br>(years) | Gender <sup>a</sup> | Non-infected  | SARS-CoV-2 | Malaria     | SARS-CoV-2<br>& malaria | Subtotal      | Total       |
|-----|----------------------|---------------------|---------------|------------|-------------|-------------------------|---------------|-------------|
| 271 | A. 5-12              | F                   | 89 (62.7%)    | 4 (2.8%)   | 49 (34.5%)  | 0                       | 142 (54.4%)   | 261 (16.8%) |
|     |                      | M                   | 69 (58,0%)    | 5 (4.2%)   | 47 (39.5%)  | 2 (1.7%)                | 119 (45,6%)   |             |
| 272 | B. 13-20             | F                   | 149 (61.1%)   | 8 (3.3%)   | 84 (35.0%)  | 1 (0.4%)                | 240 (74.3%)   | 323 (20.8%) |
| 273 |                      | M                   | 54 (65.1%)    | 1 (1.2%)   | 28 (33.7%)  | 0                       | 83 (25.7%)    |             |
| 274 | C. 21-40             | F                   | 444 (79,1%)   | 11 (2.0%)  | 108 (19.2%) | 2 (0.4%)                | 561 (78,0%)   | 719 (46.2%) |
| 275 |                      | M                   | 128 (81,0%)   | 9 (5.7%)   | 21(13.3%)   | 0                       | 158 (22.0%)   |             |
| 276 | D. >40               | F                   | 152 (82.0%)   | 5 (2.7%)   | 30 (16.1%)  | 1 (0.5%)                | 186 (73.5%)   | 253 (16.3%) |
|     |                      | M                   | 52 (77.6%)    | 3 (4.5%)   | 12 (17.9%)  | 0                       | 67 (26.5%)    |             |
| 277 | Subtotal             | F                   | 834 (67.9%)   | 28 (2.5%)  | 271 (24.0%) | 4 (0.3%)                | 1.129 (72.6%) |             |
| 278 |                      | M                   | 303 (71,0%)   | 18 (4.2%)  | 108 (25.3%) | 2 (0.5%)                | 427 (27.4%)   |             |
| 279 | <b>Total</b>         |                     | 1.137 (73.1%) | 46 (3.0%)  | 379 (24.4%) | 6 (0.4%)                |               | 1.556       |

280 Data are presented as n (%).

281 <sup>a</sup> F: female; M: male

282

283 For this sampling period and subjects, a total of 46 individuals tested positive by SARS-  
284 CoV-2 antigen rapid diagnostic tests, resulting in an overall prevalence of 3.0% (95% CI  
285 2.1-3.8). However, most of the positives were in the health centres of Bioko Island,  
286 resulting in a local prevalence of 6.7% (43 positives out of 643 samples) (**S2 Table in S1**  
287 **Text**). This agrees with the official data from Equatorial Guinea authorities reporting that  
288 most SARS-CoV-2 cases were from Bioko Island (7), the site of the capital. SARS-CoV-  
289 2 positive cases were found at similar prevalence in all age groups (**Fig 1A**) and there  
290 were no significant differences between males and females ( $W = 39812$ ,  $p$ -value = 0.07)  
291 (**Fig 1B**). However, a temporal trend for SARS-CoV-2 positives increased progressively  
292 over the sampling period to reach a peak of 10% of prevalence in September 2021 (**Fig**  
293 **2**). This trend agrees with the official reports for this country that recorded 4,739 COVID-  
294 19 cases by September 2021 (49), coinciding with our sampling period with a peak of  
295 cases. Regarding the symptomatology of these cases, most of the SARS-CoV-2 positive  
296 cases were mild symptomatic (91.3%), with fever as the most common symptom (**S3 and**  
297 **S4 Tables in S1 Text**).

298

299 **Fig 1. Prevalence of SARS-CoV-2 and malaria cases by age group and gender.**

300 (A) Prevalence by age group. (B) Prevalence by gender.

301 **Fig 2. Prevalence of SARS-CoV-2 and malaria over the study period.**

302

303 Nasopharyngeal swabs available of 43 SARS-CoV-2 positive samples were confirmed  
304 positive by RT-qPCR with high viral loads, and cycle threshold values were in the range  
305 of 7-29. The RNA of these 43 PCR-positive samples was sent for whole genome  
306 sequencing. After genome assembly and quality control, good quality genomes were  
307 obtained from 40 samples and medium/low quality genomes from three samples. All the

308 sequences were assigned to lineages using the dynamic lineage classification method,  
309 Phylogenetic Assignment of Named Global Outbreak Lineages (PANGOLIN) (35).  
310 Phylogenetic analysis revealed that most of the sequences belonged to the lineage AY.43  
311 (38 samples), however, other minor lineages were found, like AY.36 (3 samples) and  
312 B.1.351 (2 samples) (**Fig 3 and S5 Table in S1 text**). Our results are in line with a recent  
313 genomic study that described the SARS-CoV-2 lineages for the first three waves of the  
314 pandemic in Equatorial Guinea from February 2020 to October 2021 (5). That study  
315 reported that the first wave from April to July 2020 was dominated by the early lineage  
316 B.1.192, the second wave from January to April 2021 was caused by the Beta VOC  
317 (B.1.351), and the third wave that began in July 2021 was dominated by the Delta VOC  
318 (AY.43).

319

320 **Fig 3. Phylogenetic tree with the 43 new SARS-CoV-2 genomes from Equatorial**  
321 **Guinea.** Equatorial Guinea genomes placed on a reference tree of 1,495 published  
322 genomes from all over the world. Phylogenetic tree generated with Nextclade online  
323 software v2.5.0 (<https://clades.nextstrain.org>) (accessed on 01 Jun 2023) and visualized  
324 using Auspice v2.37.3 (<https://auspice.us/>).

325

326 Our sampling period began in June 2021, when a few positive cases were detected and  
327 coincided with the end of the second wave (**Fig 2**). From the end of June to the first half  
328 of July, the two genomes available were identified as Beta VOC (B.1.351). The lineage  
329 B.1.351 was first identified in South Africa in September 2020 and subsequently defined  
330 as a variant of concern (VOC) (3). Since then, it spread to other African countries (50).  
331 The earliest sequence of this lineage reported from Equatorial Guinea was in January  
332 2021 (51).

333 However, the peak of our sampling mostly overlaps with the third wave of the pandemic,  
334 between August and September 2021 (**Fig 2**). For that period, most isolated sequences  
335 were identified as the Delta variant (AY.43), the VOC that dominated the third wave in  
336 Equatorial Guinea. Delta variant was first detected in India in late 2020 (52), from where  
337 it was spread to more than 170 countries, including 37 African territories (4). It has been  
338 reported that most of the introductions of this variant into Africa (72%) can be attributed  
339 to India (4).

340 The other minor lineage found in this study was AY.36, corresponding to samples  
341 collected at the end of August. This is an uncommon Delta lineage that was dominant in  
342 Nigeria by June-August 2021 (80% cases) but that represented less 0.5% of Delta cases  
343 globally as of September 2021 (6). Its introduction in Nigeria was inferred due to a single  
344 introduction during April 2021 and the subsequent spread in the country (6).

345 To better determine the likely origin and introduction period of the Equatorial Guinea  
346 sequenced samples, we performed a genome-based epidemiological analysis using  
347 pandemic-scale phylogenies (53). The results are summarized in **Fig 4 and Table S6**, our  
348 script identifies 17 unique introductions and 7 transmission groups or clusters, whereas  
349 11 out of 43 samples remain unclassified. Regarding the origin of the introductions, both  
350 the transmission groups and unique introductions are mostly of European origin (71.4%,  
351 5 out of 7, and 47.1%, 8 out of 17; respectively), in these cases we cannot identify the  
352 exact country since many potential origins were found.

353

354 **Fig 4. Origin and introduction period of the Equatorial Guinea sequenced samples.**

355 (A) Dot plots display introduction periods for transmission groups and unique sequences.

356 Each dot and its segment represent an introduction and its estimated time interval of

357 entrance in the country, coloured by the origin. (B) Pie charts represent the proportion of  
358 introductions for transmission groups (top pie) and unique introductions (bottom pie).

359

360 In those cases, where the country of origin was identified, we found one transmission  
361 group from the United Kingdom (UK) and another from Spain. Concerning 9 unique  
362 introductions identified by country, they come from France (4/17, 23.5%), UK (3/17,  
363 17.6%), Spain (1/17, 5.9%) and Denmark (1/17, 5.9%). The introductions from Spain  
364 correspond to the three AY.36 samples, the two Beta (B.1.351) samples came from UK  
365 and France, while the 27 identified AY.43 samples belong to Europe (16/27), France  
366 (7/27), UK (3/27) and Demark (1/27). Collectively, these results point to that the  
367 introduction of SARS-CoV-2 to Equatorial Guinea was mainly from outside Africa, not  
368 from neighbouring countries.

369 Regarding the estimated time interval of the introductions, both Beta introductions  
370 present a wider interval when compared with Delta, with a range of 2 to 3 months of  
371 uncertainty (**Fig 4**). However, this may be due to the large-scale sequencing effort of  
372 Delta compared to Beta (~39 K Beta sequences vs. ~ 5 M Delta sequences in GISAID).  
373 In our analysis, most Delta introductions occurred between mid-July and mid-September,  
374 in concordance with the Delta wave seen at a global scale.

375 In relation to malaria incidence in Equatorial Guinea, 379 individuals were positive by  
376 microscopy out of 1,556 tested (24.4% [95% CI 22.2-26.5]). No significant sex difference  
377 was observed ( $W = 226149$ ,  $p$ -value = 0.6) (**Fig 1B**). However, there were significant  
378 differences between age groups in malaria prevalence (Kruskal-Wallis chi-squared =  
379 64.812,  $df = 3$ ,  $p$ -value < 0.001), with malaria mainly affecting children aged below 12  
380 years (36.8% [95% CI 30.9-42.7]) and teenagers between 13-20 years old (34.7% [95%  
381 CI 29.5-39.9]) (**Fig 1A**). The majority of the malaria-positive individuals were



382 symptomatic (92,3%), and the most common symptom was fever ( $\geq 37.5$ ), but also  
383 included other mild to moderate symptoms such as headache, weakness, muscle and joint  
384 pain, cough, dizziness, vomiting, diarrhoea and anorexia (**S3 and S4 Tables in S1 text**).

385 No comorbidities were reported among the malaria-positive cases.

386 When considering these two diseases together, we report six cases of confirmed SARS-  
387 CoV-2 co-infection with malaria. Of them, two were children (8 and 10 years old), one  
388 was a teenager (14 years old), and three were adults (25, 33 and 41 years old) (**Table 1**).

389 Most of the co-infections were detected during the peak of SARS-CoV-2 cases in  
390 September 2021 (**Fig 2**). The sequenced co-infection cases were the dominant lineage  
391 AY.43 (4 samples) and B.1.351 (1 sample) (**S5 Table in S1 Text**). One case was not  
392 sequenced because the swab sample could not be obtained. Five co-infection cases were  
393 symptomatic, the symptoms registered for three cases were mild and included fever,  
394 weakness, headache and dizziness. For the other two cases the symptoms were not  
395 specified (**S3 and S4 Tables in S1 Text**).

396 The overall co-infection prevalence reported in this study is low, 0.4% (6/1,556),  
397 however, if we calculate the co-infection prevalence among the malaria-positive  
398 subpopulation, it corresponds to the 1.6% (6/379), and the co-infection prevalence among  
399 the COVID-19 subpopulation is 13% (6/46). One possible explanation for the low rate of  
400 co-infections in our study could be the small sample size for the age group of adults >40  
401 years (16.3%, 253/1,556) and children of 5-12 years (16.8%, 261/1,556), the groups most  
402 affected by COVID-19 and malaria, respectively. Indeed, in our previous study carried  
403 out in Burkina Faso, most of the co-infections were detected in children and teenagers  
404 (15), while in another study of Uganda, the highest prevalence of co-infection was in the  
405 age groups of 0-20 years and above 60 years (20).

406 Apart from this study, SARS-CoV-2 and malaria co-infection population studies have  
407 been conducted on nine malaria-endemic countries with heterogeneous results depending  
408 on the study design and the population or subpopulation studied (**S1 Table in S1 Text**).

409 Most studies have evaluated malaria co-infection prevalence among COVID-19  
410 confirmed patients reporting a wide range of prevalence from 0.63% to 100% (17–  
411 21,23,26). Among the few studies that have analysed a random population sample, the  
412 low co-infection prevalence that we found in Equatorial Guinea (0.4%) is in the range  
413 with what has been reported from Nigeria (0.32%) (16), India (0.73%) (27), Burkina Faso  
414 (1.9%) (15), Angola (1.9%) (25) and Gabon (2.2%) (24).

415 Finally, the low co-infection rate in this and other studies is supported by our previous  
416 work in which we explored “*in vitro*” co-infection of human erythrocytes by *Plasmodium*  
417 and SARS-CoV-2. In that study, we reported a low entry of SARS-CoV-2 and a negligible  
418 interaction with *Plasmodium falciparum*, so the presence of either pathogen does not  
419 affect SARS-CoV-2 or *Plasmodium* infection (54). Our findings in mature erythrocytes  
420 were in contrast to other studies that reported direct SARS-CoV-2 infection of human  
421 erythroid progenitors causing impaired haemoglobin homeostasis, anaemia and other  
422 coagulopathies observed in COVID-19 patients (55,56).

423 The low SARS-CoV-2 prevalence reported in Equatorial Guinea and the low case severity  
424 would support the hypothesis of protection by cross-immunity or trained immunity due  
425 to co-occurring endemic diseases such as malaria (46–48). In this study, however, we  
426 cannot conclude the consequences of malaria and COVID-19 co-infection since the  
427 clinical course for co-infection cases was not systematically recorded. Some other studies  
428 have addressed the clinical consequences of malaria and COVID-19 co-infection but with  
429 contradictory results. Recent retrospective studies of COVID-19 patients have found that  
430 malaria co-infection is associated with prolonged hospitalisation (26) and had greater

431 mortality risk compared with just SARS-CoV-2 infection (23). However, other studies  
432 report that patients with SARS-CoV-2 and malaria did not seem to have a worst disease  
433 outcome, but previous malaria exposure seems to be related to less frequency of severe  
434 COVID-19 (20). In another study, COVID-19 patients co-infected with malaria had  
435 significantly faster recovery compared to those not co-infected (27). All this considered,  
436 additional retrospective and prospective studies are required to better understand the  
437 clinical implications of SARS-CoV-2 and malaria co-infections.

438

## 439 **Conclusion**

440 The present study expands on the limited knowledge about COVID-19 prevalence in  
441 Central Africa. Our results provide further insights into SARS-COV-2 variant circulation,  
442 transmission and evolution in Africa, and confirmed that by June to October 2021, the  
443 Delta variant AY.43 was dominating the SARS-CoV-2 infections in Equatorial Guinea,  
444 together with a few minor variants. This study also challenges the assumption of Africa  
445 as a source of new variants that subsequently spread globally. Finally, we report SARS-  
446 CoV-2 and malaria co-infection cases but at low frequency in the population. Importantly,  
447 co-infection cases did not worsen symptoms or severity.

448

## 449 **Acknowledgments**

450 We would like to thank all volunteers who participated in this study and the local  
451 authorities and communities in Equatorial Guinea for their support. We also thank the  
452 IPBLN and IBV core facilities for their support to project activities.

453

## 454 **References**

- 455 1. World Health Organization. WHO COVID-19 Dashboard [Internet]. [cited 2023  
456 Jul 28]. Available from: <https://covid19.who.int/>
- 457 2. Kannan S, Shaik Syed Ali P, Sheeza A. Omicron (B.1.1.529) - variant of concern  
458 - molecular profile and epidemiology: A mini review. *Eur Rev Med Pharmacol*  
459 *Sci.* 2021;25(24):8019–22.
- 460 3. Tegally H, Wilkinson E, Lessells RJ, Giandhari J, Pillay S, Msomi N, et al.  
461 Sixteen novel lineages of SARS-CoV-2 in South Africa. *Nat Med* [Internet].  
462 2021;27(3):440–6. Available from: [http://dx.doi.org/10.1038/s41591-021-01255-](http://dx.doi.org/10.1038/s41591-021-01255-3)  
463 3
- 464 4. Tegally H, San JE, Cotten M, Moir M, Tegomoh B, Mboowa G, et al. The  
465 evolving SARS-CoV-2 epidemic in Africa: Insights from rapidly expanding  
466 genomic surveillance. *Science* [Internet]. 2022 Oct 7 [cited 2023 Jun  
467 5];378(6615). Available from: [/pmc/articles/PMC9529057/](https://pubmed.ncbi.nlm.nih.gov/39529057/)
- 468 5. Hosch S, Mpina M, Nyakurungu E, Borico NS, Obama TMA, Ovona MC, et al.  
469 Genomic Surveillance Enables the Identification of Co-infections With Multiple  
470 SARS-CoV-2 Lineages in Equatorial Guinea. *Front Public Heal.*  
471 2022;9(January):1–7.
- 472 6. Ozer EA, Simons LM, Adewumi OM, Fowotade AA, Omoruyi EC, Adeniji JA,  
473 et al. Multiple expansions of globally uncommon SARS-CoV-2 lineages in  
474 Nigeria. *Nat Commun.* 2022;13(1).
- 475 7. MINSABS. Ministerio de Sanidad y Bienestar Social-Guinea Equatorial  
476 [Internet]. [cited 2023 Apr 23]. Available from:  
477 <https://guineasalud.org/estadisticas/>
- 478 8. Shu Y, McCauley J. GISAID: Global initiative on sharing all influenza data –  
479 from vision to reality. *Eurosurveillance* [Internet]. 2017 Mar 3 [cited 2023 Aug

- 480 22];22(13):1. Available from: </pmc/articles/PMC5388101/>
- 481 9. World Health Organization. Scaling up genomic sequencing in Africa [Internet].  
482 Available from: [https://www.afro.who.int/news/scaling-genomic-sequencing-](https://www.afro.who.int/news/scaling-genomic-sequencing-africa)  
483 [africa](https://www.afro.who.int/news/scaling-genomic-sequencing-africa)
- 484 10. Uwishema O, Badri R, Onyeaka H, Okereke M, Akhtar S, Mhanna M, et al.  
485 Fighting Tuberculosis in Africa: The Current Situation Amidst the COVID-19  
486 Pandemic. *Disaster Med Public Health Prep* [Internet]. 2022 [cited 2023 Jul 3];  
487 Available from: <https://pubmed.ncbi.nlm.nih.gov/35673793/>
- 488 11. Shi B, Zheng J, Xia S, Lin S, Wang X, Liu Y, et al. Accessing the syndemic of  
489 COVID-19 and malaria intervention in Africa. *Infect Dis poverty* [Internet]. 2021  
490 Dec 1 [cited 2023 Jul 3];10(1). Available from:  
491 <https://pubmed.ncbi.nlm.nih.gov/33413680/>
- 492 12. Uwishema O, Sapkota S, Wellington J, Onyeaka CVP, Onyeaka H.  
493 Leishmaniasis control in the light of the COVID-19 pandemic in Africa. *Ann*  
494 *Med Surg* [Internet]. 2022 Aug 1 [cited 2023 Jul 3];80:104263. Available from:  
495 </pmc/articles/PMC9339101/>
- 496 13. (WHO) WHO. World malaria report 2022. Geneva; 2022.
- 497 14. World Health Organization. The potential impact of health service disruptions on  
498 the burden of malaria: a modelling analysis for countries in sub-Saharan Africa  
499 [Internet]. 2020. 29 p. Available from:  
500 <https://www.who.int/publications/i/item/9789240004641>
- 501 15. López-Farfán D, Yerbanga RS, Parres-Mercader M, Torres-Puente M, Gómez-  
502 Navarro I, Sanou DMS, et al. Prevalence of SARS-CoV-2 and co-infection with  
503 malaria during the first wave of the pandemic (the Burkina Faso case). *Front*  
504 *Public Heal* [Internet]. 2022 Dec 12 [cited 2023 Jan 18];10. Available from:

- 505            [/pmc/articles/PMC9791192/](#)
- 506    16.    Amoo OS, Aina OO, Okwuraiwe AP, Onwuamah CK, Shaibu JO, Ige F, et al.  
507            COVID-19 Spread Patterns Is Unrelated to Malaria Co-Infections in Lagos,  
508            Nigeria. *Adv Infect Dis*. 2020;10(05):200–15.
- 509    17.    Muhammad Y, Aminu YK, Ahmad AE, Iliya S, Muhd N, Yahaya M, et al. An  
510            elevated 8-isoprostaglandin F2 alpha (8-iso-PGF2 $\alpha$ ) in COVID-19 subjects co-  
511            infected with malaria. *Pan Afr Med J [Internet]*. 2020 Sep 21 [cited 2022 Sep  
512            15];37(78):1–10. Available from: [/pmc/articles/PMC7680236/](#)
- 513    18.    Onosakponome EO, Wogu MN. The Role of Sex in Malaria-COVID19  
514            Coinfection and Some Associated Factors in Rivers State, Nigeria. *J Parasitol*  
515            *Res*. 2020;2020.
- 516    19.    Matangila JR, Nyembu RK, Telo GM, Ngoy CD, Sakobo TM, Massolo JM, et al.  
517            Clinical characteristics of COVID-19 patients hospitalized at Clinique Ngaliema,  
518            a public hospital in Kinshasa, in the Democratic Republic of Congo: A  
519            retrospective cohort study. *PLoS One [Internet]*. 2020;15(12 December):1–15.  
520            Available from: <http://dx.doi.org/10.1371/journal.pone.0244272>
- 521    20.    Achan J, Serwanga A, Wanzira H, Kyagulanyi T, Nuwa A, Magumba G, et al.  
522            Current malaria infection, previous malaria exposure, and clinical profiles and  
523            outcomes of COVID-19 in a setting of high malaria transmission: an exploratory  
524            cohort study in Uganda. *The Lancet Microbe [Internet]*. 2022;3(1):e62–71.  
525            Available from: [http://dx.doi.org/10.1016/S2666-5247\(21\)00240-8](http://dx.doi.org/10.1016/S2666-5247(21)00240-8)
- 526    21.    Bakamutumaho B, Cummings MJ, Owor N, Kayiwa J, Namulondo J,  
527            Byaruhanga T, et al. Severe COVID-19 in uganda across two epidemic phases: A  
528            prospective cohort study. *Am J Trop Med Hyg*. 2021;105(3):740–4.
- 529    22.    Morton B, Barnes KG, Anscombe C, Jere K, Matambo P, Mandolo J, et al.

- 530 Distinct clinical and immunological profiles of patients with evidence of SARS-  
531 CoV-2 infection in sub-Saharan Africa. *Nat Commun.* 2021;12(1).
- 532 23. Hussein R, Guedes M, Ibraheim N, Ali MM, El-Tahir A, Allam N, et al. Impact  
533 of COVID-19 and malaria coinfection on clinical outcomes: a retrospective  
534 cohort study. *Clin Microbiol Infect.* 2022 Aug 1;28(8):1152.e1-1152.e6.
- 535 24. Ditombi BCM, Ngondza BP, Boulingui CM, Nguema OAM, Ngomo JMN,  
536 M'Bondoukwé NP, et al. Malaria and COVID-19 prevalence in a population of  
537 febrile children and adolescents living in Libreville. *South African J Infect Dis*  
538 [Internet]. 2022 Oct 26 [cited 2023 Jun 7];37(1). Available from:  
539 </pmc/articles/PMC9634652/>
- 540 25. Sebastião CS, Gaston C, Paixão JP, Euclides |, Sacomboio NM, Neto Z, et al.  
541 Coinfection between SARS-CoV-2 and vector-borne diseases in Luanda, Angola.  
542 2021 [cited 2023 Jun 15]; Available from:  
543 <https://onlinelibrary.wiley.com/doi/10.1002/jmv.27354>
- 544 26. Ingabire PM, Nantale R, Sserwanja Q, Nakireka S, Musaba MW, Muyinda A, et  
545 al. Factors associated with prolonged hospitalization of patients with corona virus  
546 disease (COVID-19) in Uganda: a retrospective cohort study. *Trop Med Health*  
547 [Internet]. 2022 Dec 1 [cited 2023 Jun 16];50(1):100. Available from:  
548 </pmc/articles/PMC9795158/>
- 549 27. Mahajan NN, Gajbhiye RK, Bahirat S, Lokhande PD, Mathe A, Rathi S, et al.  
550 Co-infection of malaria and early clearance of SARS-CoV-2 in healthcare  
551 workers. *J Med Virol.* 2021;93(4):2431–8.
- 552 28. WHO. *Malaria Microscopy Quality Assurance Manual.* 2009;
- 553 29. Grubaugh ND, Gangavarapu K, Quick J, Matteson NL, De Jesus JG, Main BJ, et  
554 al. An amplicon-based sequencing framework for accurately measuring intrahost

- 555 virus diversity using PrimalSeq and iVar. *Genome Biol* [Internet]. 2019 Jan 8  
556 [cited 2022 Sep 16];20(1):1–19. Available from:  
557 <https://genomebiology.biomedcentral.com/articles/10.1186/s13059-018-1618-7>
- 558 30. Wood DE, Salzberg SL. Kraken: Ultrafast metagenomic sequence classification  
559 using exact alignments. *Genome Biol* [Internet]. 2014 Mar 3 [cited 2022 Sep  
560 16];15(3):1–12. Available from:  
561 <https://genomebiology.biomedcentral.com/articles/10.1186/gb-2014-15-3-r46>
- 562 31. Chen S, Zhou Y, Chen Y, Gu J. fastp: an ultra-fast all-in-one FASTQ  
563 preprocessor. *Bioinformatics* [Internet]. 2018 Sep 9 [cited 2022 Sep  
564 16];34(17):i884. Available from: [/pmc/articles/PMC6129281/](https://pubmed.ncbi.nlm.nih.gov/30147821/)
- 565 32. Ewels P, Magnusson M, Lundin S, Källér M. MultiQC: summarize analysis  
566 results for multiple tools and samples in a single report. *Bioinformatics* [Internet].  
567 2016 Oct 1 [cited 2022 Sep 16];32(19):3047–8. Available from:  
568 <https://academic.oup.com/bioinformatics/article/32/19/3047/2196507>
- 569 33. Wu F, Zhao S, Yu B, Chen YM, Wang W, Song ZG, et al. A new coronavirus  
570 associated with human respiratory disease in China. *Nat* 2020 5797798 [Internet].  
571 2020 Feb 3 [cited 2022 Sep 16];579(7798):265–9. Available from:  
572 <https://www.nature.com/articles/s41586-020-2008-3>
- 573 34. Katoh K, Standley DM. MAFFT Multiple Sequence Alignment Software Version  
574 7: Improvements in Performance and Usability. *Mol Biol Evol* [Internet]. 2013  
575 Apr 1 [cited 2022 Sep 16];30(4):772–80. Available from:  
576 <https://academic.oup.com/mbe/article/30/4/772/1073398>
- 577 35. O’Toole Á, Scher E, Underwood A, Jackson B, Hill V, McCrone JT, et al.  
578 Assignment of epidemiological lineages in an emerging pandemic using the  
579 pangolin tool. *Virus Evol* [Internet]. 2021 [cited 2022 Sep 16];7(2). Available



- 580 from: [/pmc/articles/PMC8344591/](https://pubmed.ncbi.nlm.nih.gov/3444591/)
- 581 36. Aksamentov I, Roemer C, Hodcroft EB, Neher RA. Nextclade: clade assignment,  
582 mutation calling and quality control for viral genomes. *J Open Source Softw*  
583 [Internet]. 2021 Nov 30 [cited 2022 Sep 16];6(67):3773. Available from:  
584 <https://joss.theoj.org/papers/10.21105/joss.03773>
- 585 37. Hadfield J, Megill C, Bell SM, Huddleston J, Potter B, Callender C, et al.  
586 NextStrain: Real-time tracking of pathogen evolution. *Bioinformatics*. 2018 Dec  
587 1;34(23):4121–3.
- 588 38. Sagulenko P, Puller V, Neher RA. TreeTime: Maximum-likelihood  
589 phylodynamic analysis. *Virus Evol* [Internet]. 2018 Jan 1 [cited 2022 Sep  
590 16];4(1). Available from: [/pmc/articles/PMC5758920/](https://pubmed.ncbi.nlm.nih.gov/3444591/)
- 591 39. Martínez-Martínez FJ, Massinga AJ, De Jesus Á, Ernesto RM, Cano-Jiménez P,  
592 Chiner-Oms Á, et al. Tracking SARS-CoV-2 introductions in Mozambique using  
593 pandemic-scale phylogenies: a retrospective observational study. *Lancet Glob  
594 Heal*. 2023;11(6):e933–41.
- 595 40. Turakhia Y, Thornlow B, Hinrichs AS, Maio N, Gozashti L, Lanfear R, et al.  
596 Ultrafast Sample placement on Existing tRees (UShER) enables real-time  
597 phylogenetics for the SARS-CoV-2 pandemic. *Nat Genet* [Internet]. [cited 2023  
598 Aug 23]; Available from: <https://doi.org/10.1038/s41588-021-00862-7>
- 599 41. Lanfear R. Global phylogenies of SARS-CoV-2 sequences [Internet]. Available  
600 from: <https://github.com/roblanf/sarscov2phylo>
- 601 42. Thornlow B. matUtils [Internet]. Available from: [https://usher-  
602 wiki.readthedocs.io/en/latest/matUtils.html](https://usher-wiki.readthedocs.io/en/latest/matUtils.html)
- 603 43. Sanderson T. Taxonium, a web-based tool for exploring large phylogenetic trees  
604 *eLife* 11:e82392. *Elife* [Internet]. 2022;11:e82392. Available from:

- 605 <https://doi.org/10.7554/eLife.82392%0A>
- 606 44. Kusi KA, Frimpong A, Partey FD, Lamptey H, Amoah LE, Ofori MF. High  
607 infectious disease burden as a basis for the observed high frequency of  
608 asymptomatic SARS-CoV-2 infections in sub-Saharan Africa. *AAS Open Res.*  
609 2021;4(May):2.
- 610 45. Hussein MIH, Albashir AAD, Elawad OAMA, Homeida A. Malaria and  
611 COVID-19: unmasking their ties. *Malar J* [Internet]. 2020;19(1):1–10. Available  
612 from: <https://doi.org/10.1186/s12936-020-03541-w>
- 613 46. Osei SA, Biney RP, Anning AS, Nortey LN, Ghartey-Kwansah G. Low  
614 incidence of COVID-19 case severity and mortality in Africa; Could malaria co-  
615 infection provide the missing link? *BMC Infect Dis* [Internet]. 2022;22(1):1–11.  
616 Available from: <https://doi.org/10.1186/s12879-022-07064-4>
- 617 47. Iesa MAM, Osman MEM, Hassan MA, Dirar AIA, Abuzeid N, Mancuso JJ, et al.  
618 SARS-CoV-2 and Plasmodium falciparum common immunodominant regions  
619 may explain low COVID-19 incidence in the malaria-endemic belt. *New*  
620 *microbes new Infect* [Internet]. 2020 Nov 1 [cited 2022 Jul 7];38. Available  
621 from: <https://pubmed.ncbi.nlm.nih.gov/33230417/>
- 622 48. Raham TF. Influence of malaria endemicity and tuberculosis prevalence on  
623 COVID-19 mortality. *Public Health* [Internet]. 2021;194:33–5. Available from:  
624 <https://doi.org/10.1016/j.puhe.2021.02.018>
- 625 49. Johns Hopkins University. Johns Hopkins coronavirus resource center [Internet].  
626 [cited 2023 Jul 10]. Available from:  
627 <https://coronavirus.jhu.edu/region/equatorial-guinea>
- 628 50. Wilkinson E, Giovanetti M, Tegally H, San JE, Lessells R, Cuadros D, et al. A  
629 year of genomic surveillance reveals how the SARS-CoV-2 pandemic unfolded

- 630 in Africa. *Science* (80- ). 2021;374(6566):423–31.
- 631 51. [cov-lineages.org](https://cov-lineages.org) [Internet]. Available from: [https://cov-](https://cov-lineages.org/lineage_list.html)
- 632 [lineages.org/lineage\\_list.html](https://cov-lineages.org/lineage_list.html)
- 633 52. Mlcochova P, Kemp SA, Dhar MS, Papa G, Meng B, Ferreira IATM, et al.
- 634 SARS-CoV-2 B.1.617.2 Delta variant replication and immune evasion. *Nat* 2021
- 635 5997883 [Internet]. 2021 Sep 6 [cited 2023 Jun 5];599(7883):114–9. Available
- 636 from: <https://www.nature.com/articles/s41586-021-03944-y>
- 637 53. Martínez-Martínez J, Cano-Jiménez P, Chiner-Oms Á, Bsc G-N, Guillot-
- 638 Fernández M, Jiménez-Serrano S, et al. Tracking SARS-CoV-2 introductions in
- 639 Mozambique using pandemic-scale phylogenies: a retrospective observational
- 640 study. *Artic Lancet Glob Heal* [Internet]. 2023 [cited 2023 Aug 23];11:933–74.
- 641 Available from: <https://gitlab>.
- 642 54. López-Farfán D, Irigoyen N, Gómez-Díaz E. Exploring SARS-CoV-2 and
- 643 *Plasmodium falciparum* coinfection in human erythrocytes. *Front Immunol*
- 644 [Internet]. 2023 Mar 13 [cited 2023 Jun 5];14. Available from:
- 645 <https://pubmed.ncbi.nlm.nih.gov/36993979/>
- 646 55. Huerga Encabo H, Grey W, Garcia-Albornoz M, Wood H, Ulferts R, Aramburu
- 647 IV, et al. Human Erythroid Progenitors Are Directly Infected by SARS-CoV-2:
- 648 Implications for Emerging Erythropoiesis in Severe COVID-19 Patients. *Stem*
- 649 *cell reports* [Internet]. 2021 Mar 9 [cited 2022 Aug 10];16(3):428–36. Available
- 650 from: <https://pubmed.ncbi.nlm.nih.gov/33581053/>
- 651 56. Shahbaz S, Xu L, Osman M, Sligl W, Shields J, Joyce M, et al. Erythroid
- 652 precursors and progenitors suppress adaptive immunity and get invaded by
- 653 SARS-CoV-2. *Stem Cell Reports*. 2021 May 11;16(5):1165–81.
- 654

655 **Supporting information**

656 **S1 Text. Tables S1 to S5**

657 **S6 Table. Genome-based epidemiological analysis of the sequenced samples**





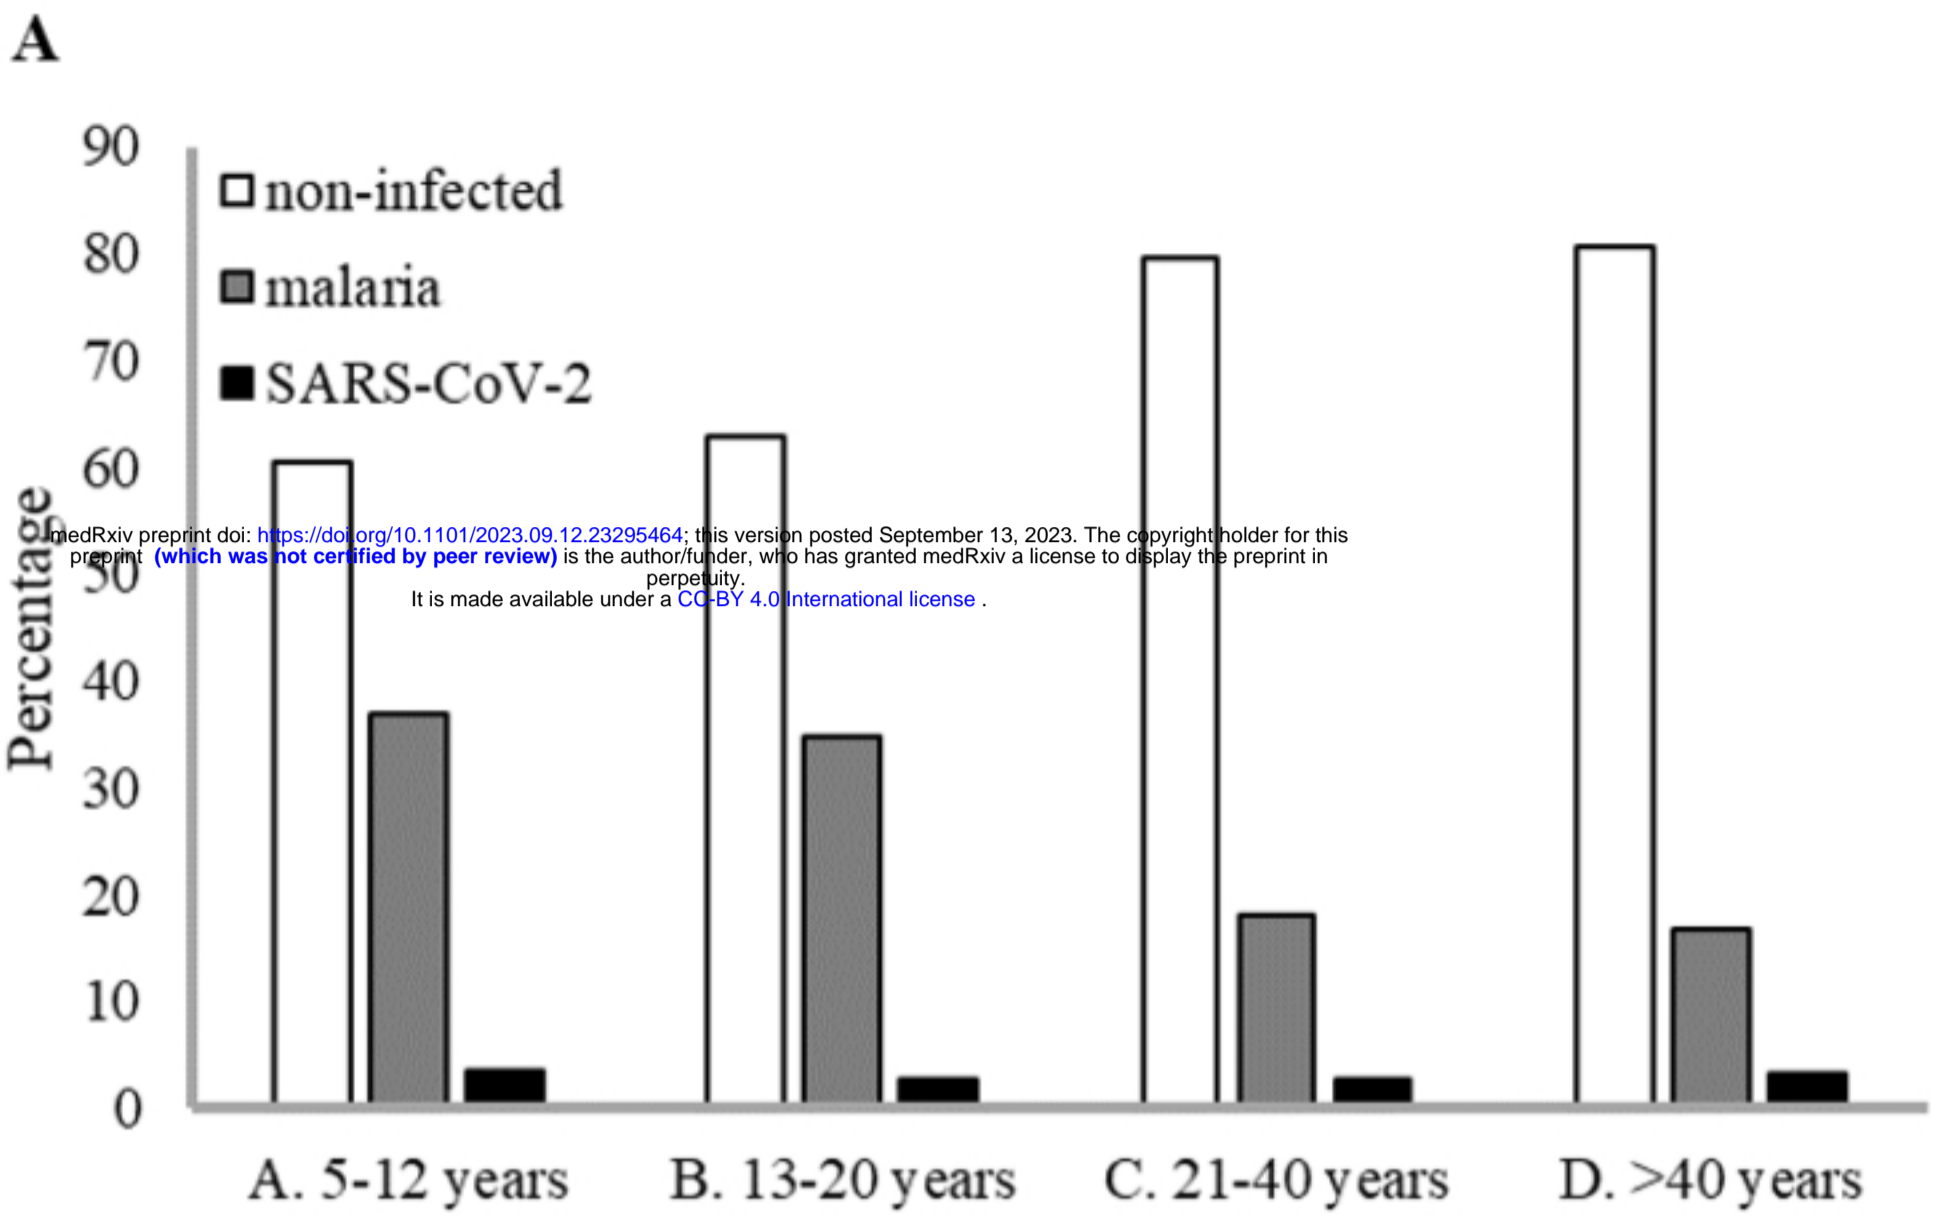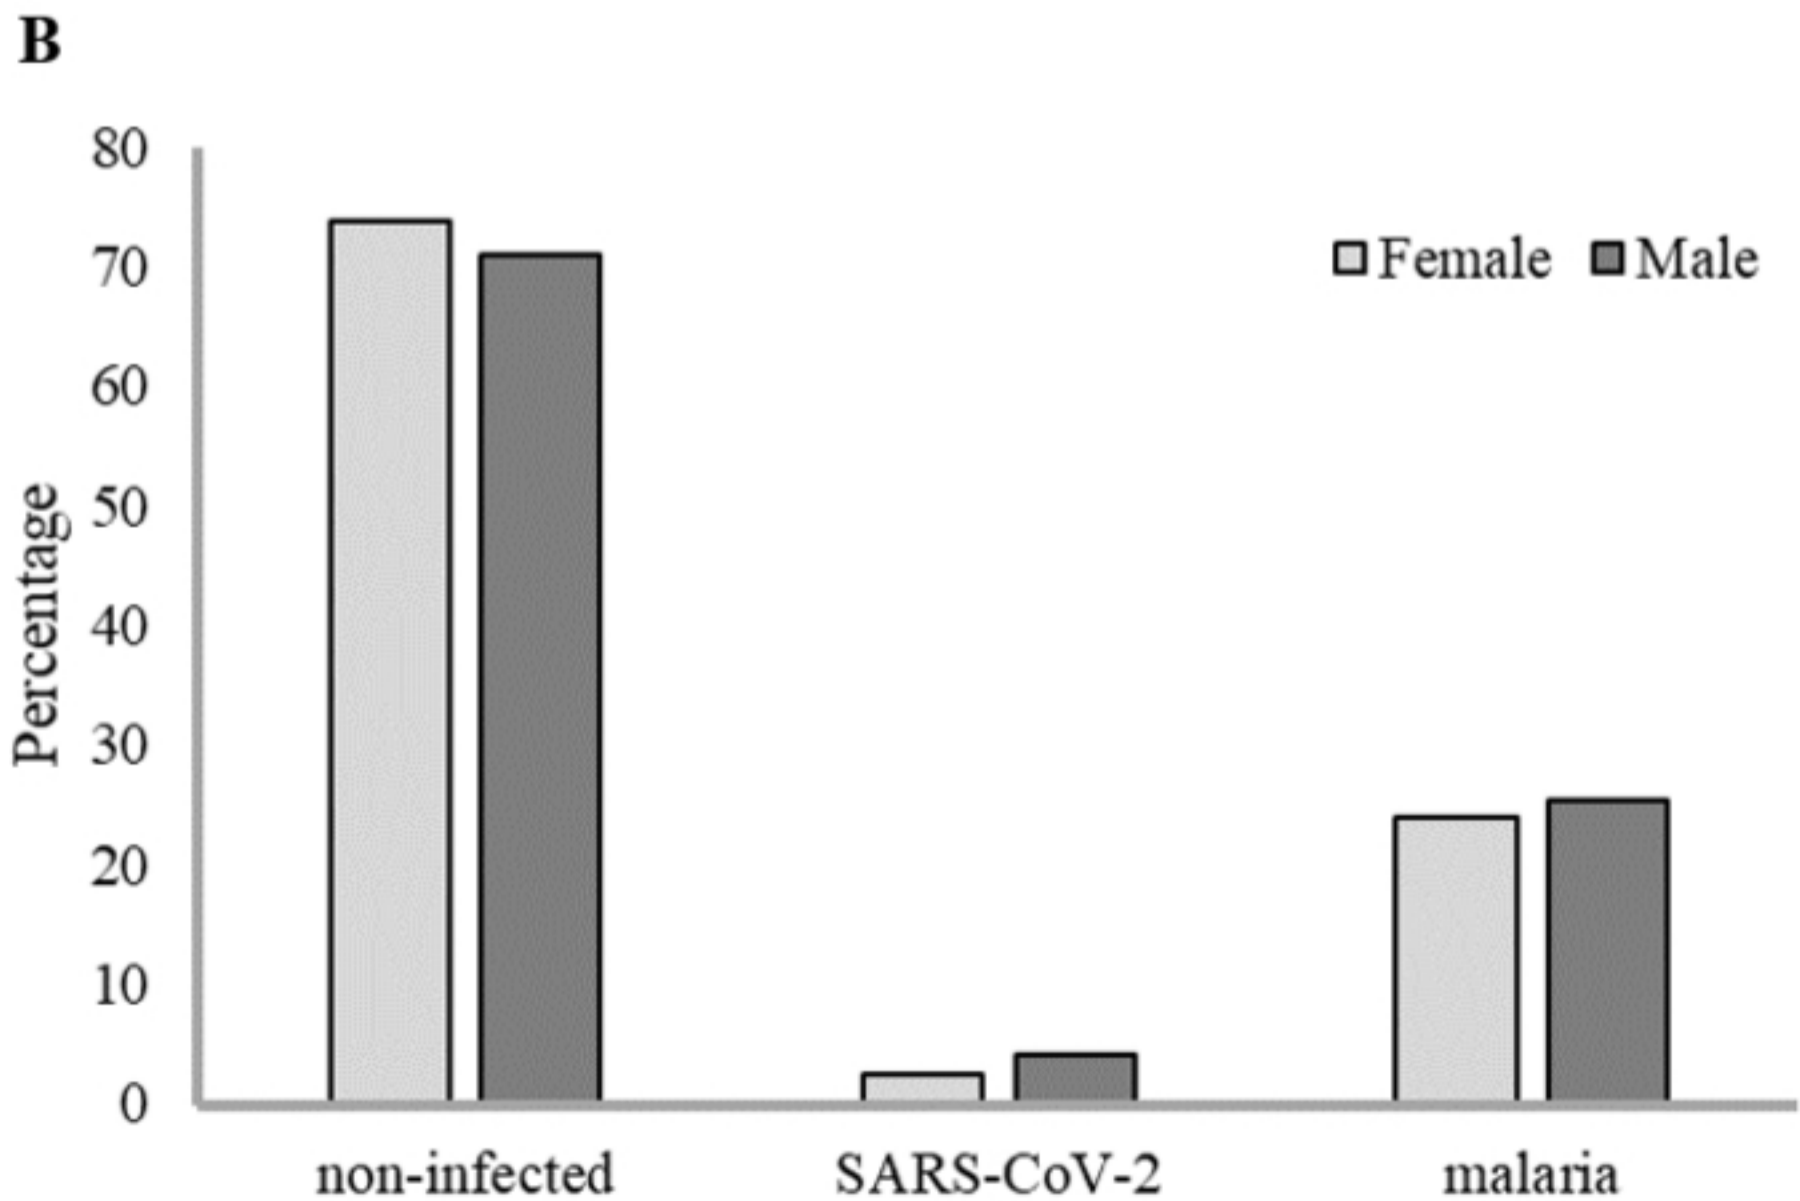

Figure

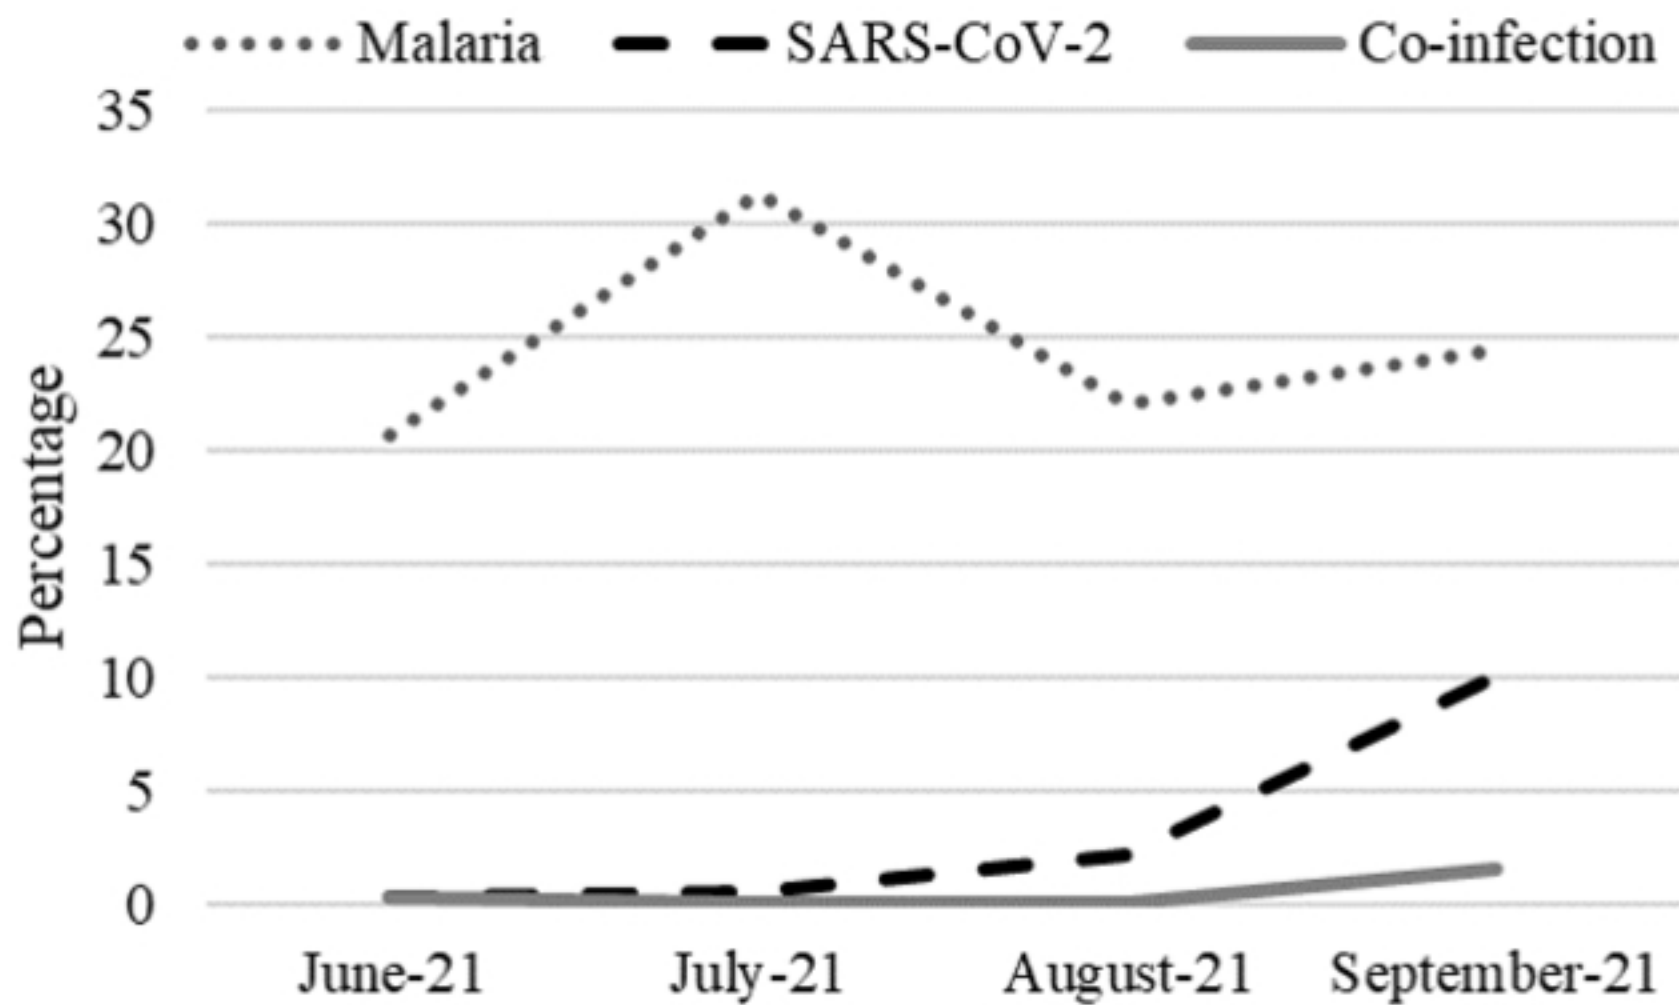

Figure



AY.43 AY.36  
B.1.351

medRxiv preprint doi: <https://doi.org/10.1101/2023.09.12.23295464>; this version posted September 13, 2023. The copyright holder for this preprint (which was not certified by peer review) is the author/funder, who has granted medRxiv a license to display the preprint in perpetuity. It is made available under a [CC-BY 4.0 International license](https://creativecommons.org/licenses/by/4.0/).

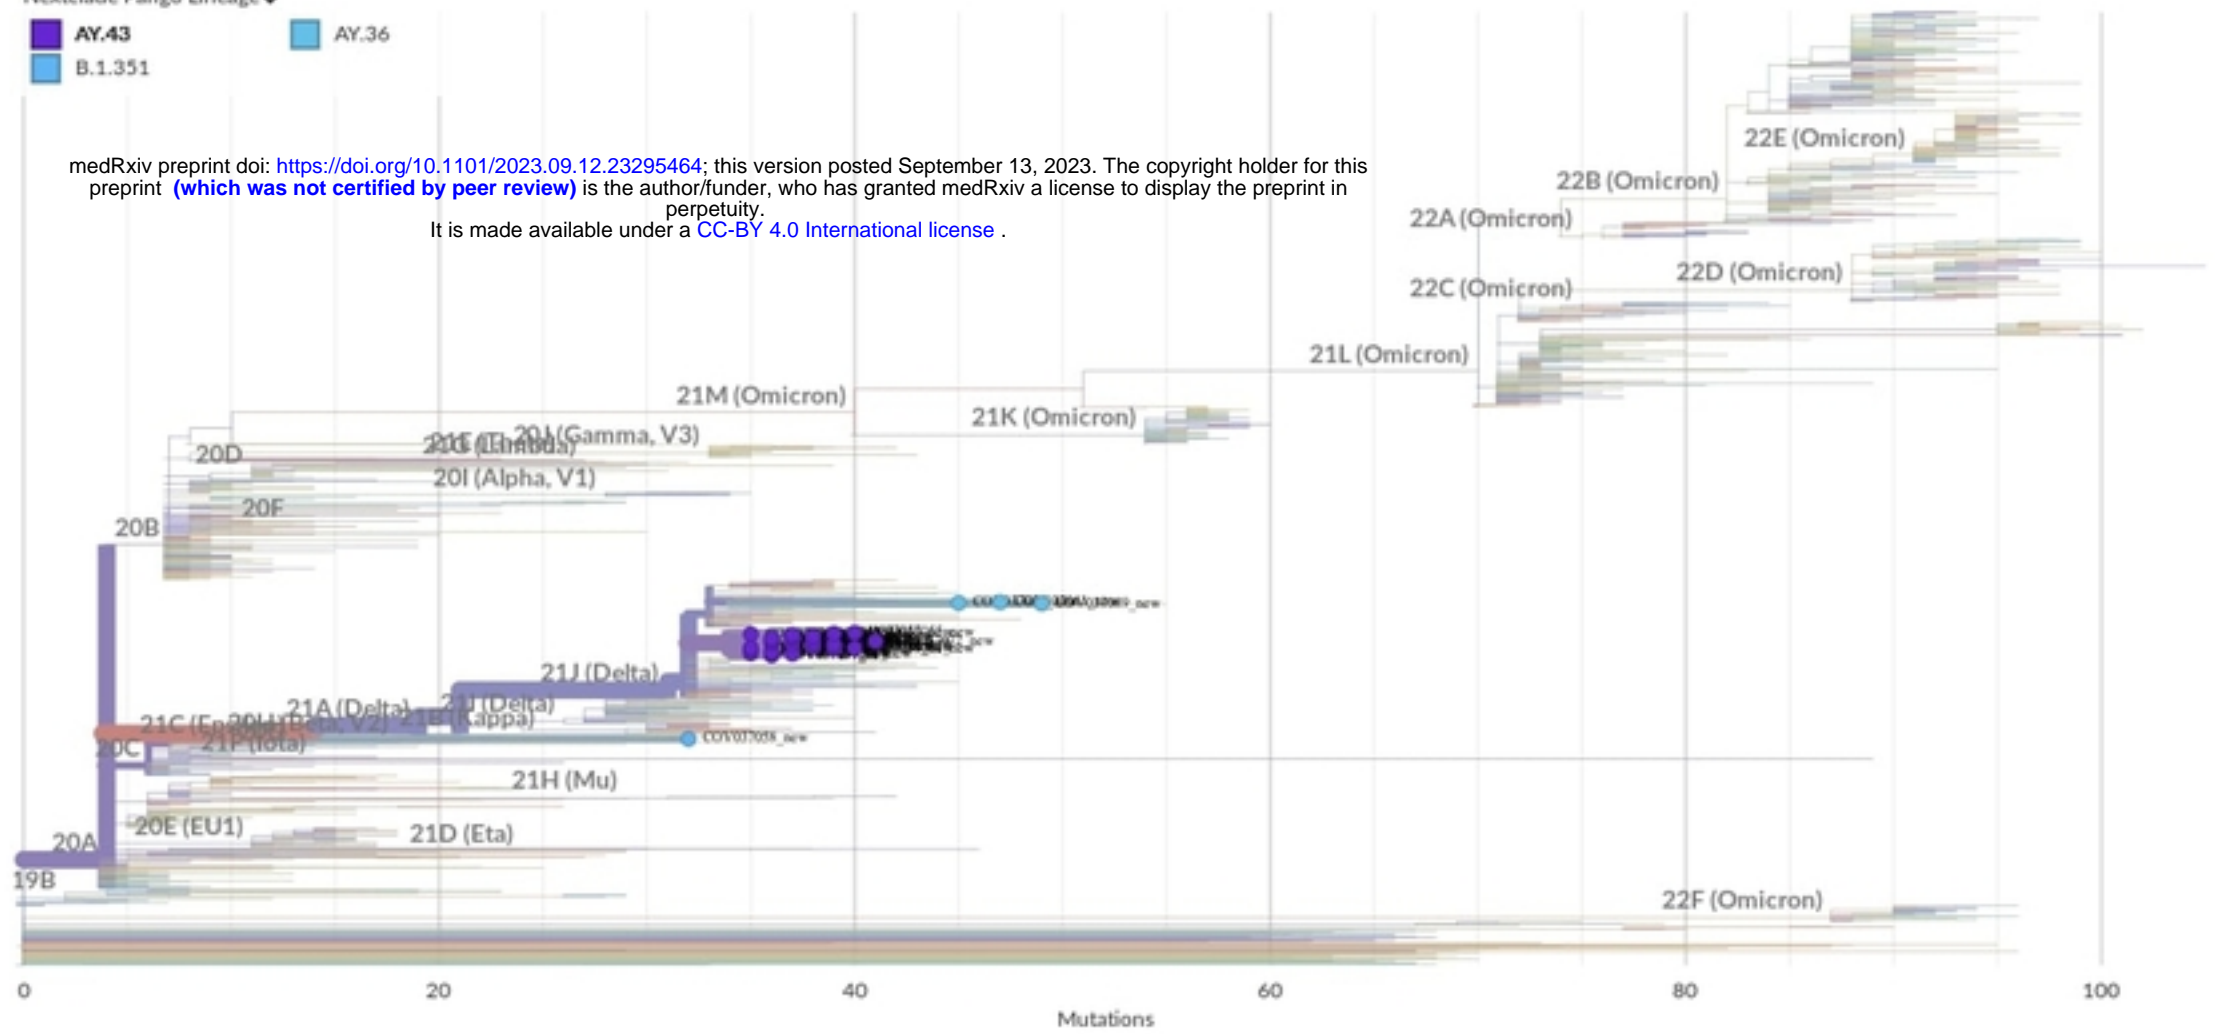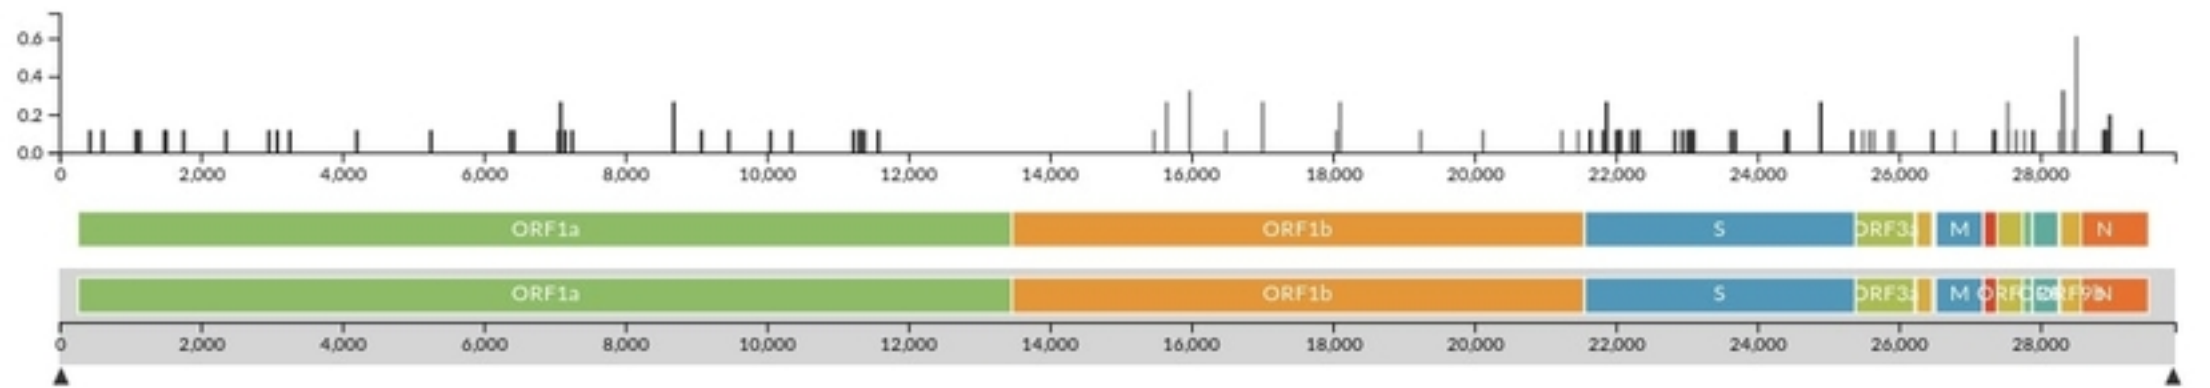

**A**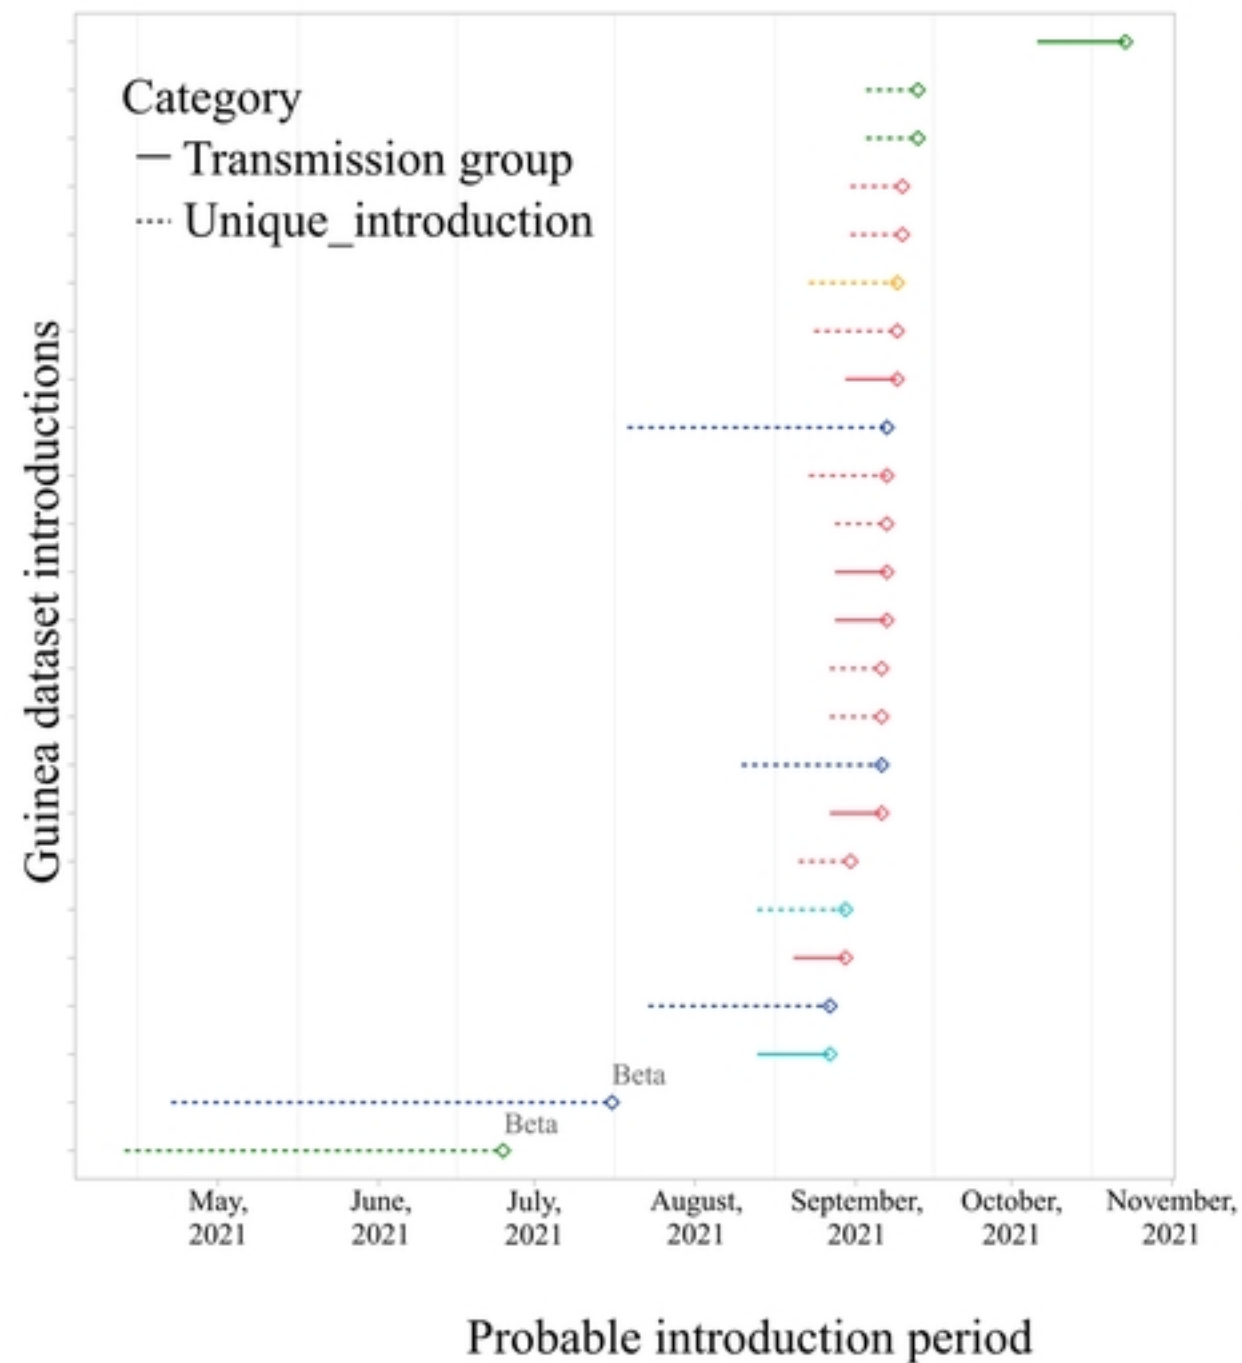**B**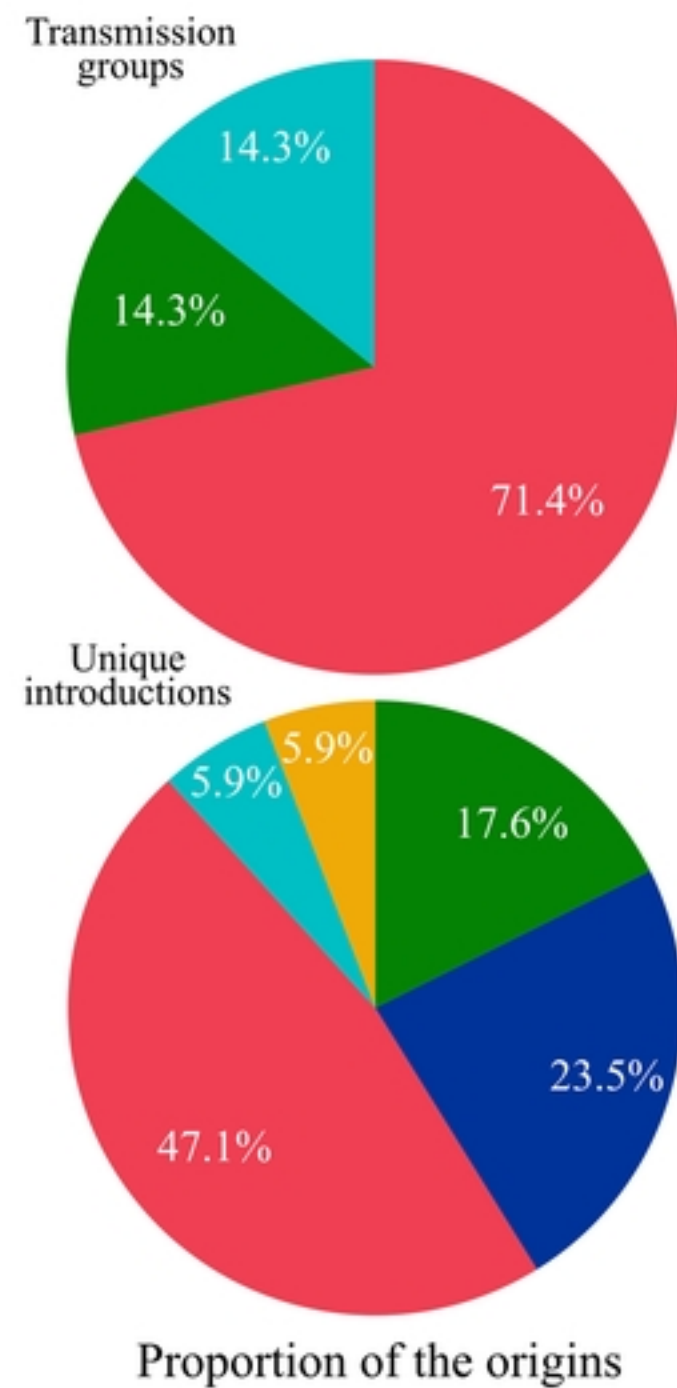

Figure
